# Supplementary material for: Bruton tyrosine kinase (BTK) may be a potential therapeutic target for interstitial cystitis/bladder pain syndrome
Source: Aging (Albany NY). 2022 Sep 5;14(17):7052–64. doi: 10.18632/aging.204271 (PMC9512503; doi:10.18632/aging.204271)
Supplement: Supplementary Figures [file aging-14-204271-s001.pdf]

## SUPPLEMENTARY FIGURES

Figure 4E

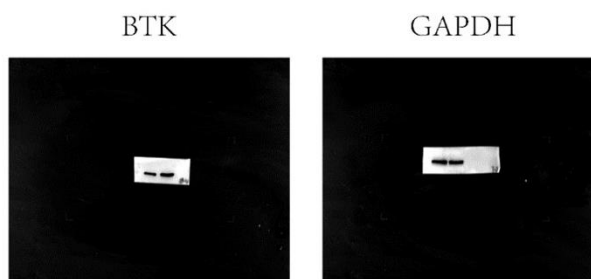

Figure 5A

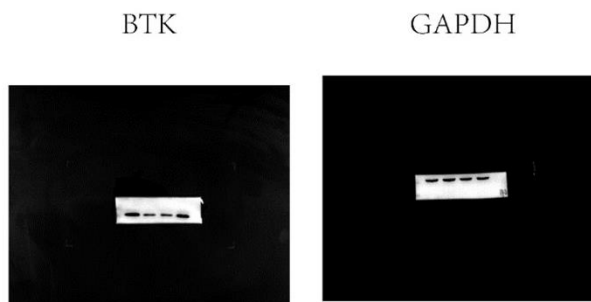

Supplementary Figure 1. Original photo of Western blotting of Figures 4E, 5A.

sh-BTK#1

```

5' - CACCGCTGGACTCTTGAGTGTAAGCGAAGTTACACTCAAGAGTCCAGC -3'
      |||||
3' - CGACCTGAGAACTCACATTCGCTTGAAATGTGAGTTCTCAGGTCGAAAA -5'
  
```

sh-BTK#2

```

5' - CACCGCACTGAACCTTTCCTCAACACGAATGTTGAGGAAAGGTTTCAGTGC -3'
      |||||
3' - CGTGACTTGGAAGGAGTTGTGCTTACAACCTCCTTTCCAAGTCACGAAAA -5'
  
```

sh-BTK#3

```

5' - CACCGCTCACAACCATCTGTAATGGCGAACCATTACAGATGGTTGTGAGC -3'
      |||||
3' - CGAGTGTTGGTAGACATTACCGCTTGGTAATGTCTACCAACACTCGAAAA -5'
  
```

NC 5'-GATCCACTACCGTTGTTATAGGTGGAGTACTGCACCTATAACAACGGTAGTTTTTTC-3'

Supplementary Figure 2. The sh-BTK and NC sequences used in our cell verification experiment.
